# Supplementary material
Source: PubMed Central journal article supplement (PMC8453795)
Supplement: cvaa067_supplementary_data.pdf [file cvaa067_supplementary_data.pdf]

1 SUPPLEMENTAL DATA

2 **Sectm1a Deficiency Aggravates Inflammation-Triggered Cardiac Dysfunction**  
3 **through Disruption of LXRA Signaling in Macrophages**  
4

5 Yutian Li<sup>1</sup>, Shan Deng<sup>2</sup>, Xiaohong Wang<sup>1</sup>, Wei Huang<sup>3</sup>, Jing Chen<sup>4,5</sup>, Nathan Robbins<sup>6</sup>,  
6 Xingjiang Mu<sup>1</sup>, Kobina Essandoh<sup>1</sup>, Tianqing Peng<sup>7</sup>, Anil G. Jegga<sup>4</sup>, Jack Rubinstein<sup>6</sup>,  
7 David E. Adams<sup>8</sup>, Yigang Wang<sup>3</sup> Jiangtong Peng<sup>2\*</sup>, Guo-Chang Fan<sup>1\*</sup>

8  
9 <sup>1</sup>Pharmacology and Systems Physiology, <sup>3</sup>Department of Pathology and Laboratory Medicine,  
10 <sup>5</sup>Department of Pediatrics, <sup>6</sup>Internal Medicine, <sup>8</sup>Division of Immunology, Allergy and  
11 Rheumatology, University of Cincinnati College of Medicine; <sup>2</sup>Department of Cardiology, Union  
12 Hospital, Tongji Medical College, Huazhong University of Science and Technology, Wuhan,  
13 Hubei 430022, China. <sup>4</sup>Division of Biomedical Informatics, Cincinnati Children's Hospital,  
14 Cincinnati, OH, USA, 45267; <sup>7</sup>Critical Illness Research, Lawson Health Research Institute,  
15 Ontario N6A 4G5, Canada;

16 \*, To whom correspondence should be addressed:

17 Guo-Chang Fan, PhD,  
18 Department of Pharmacology and Systems Physiology  
19 University of Cincinnati College of Medicine  
20 231 Albert Sabin Way, Cincinnati, OH 45267-0575  
21 Phone: (513) 558-2340, Fax: (513) 558-9969  
22 Email: [fangg@ucmail.uc.edu](mailto:fangg@ucmail.uc.edu)

23  
24 Jiangtong Peng, PhD,  
25 Department of Cardiology  
26 Union Hospital, Tongji Medical College  
27 Huazhong University of Science and Technology  
28 Wuhan, China 430022  
29 Email: [pjthust@126.com](mailto:pjthust@126.com)

30

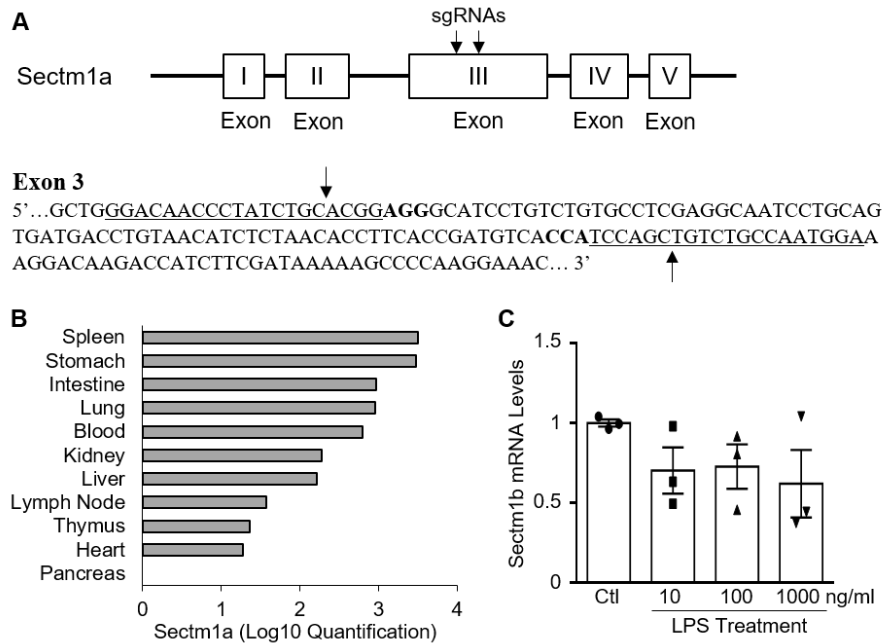

31

32 **Fig. S1** Generation of knockout mouse model of Sectm1a. (A) Two gRNAs targeting to Exon3 were  
 33 selected to inject with Cas9mRNA into one-cell embryos. Because of the Cas9 activity, sequence between  
 34 the gRNA targeting sites were deleted. The PAM of each gRNA targeting site is highlighted in bold. The  
 35 spacer sequence is underlined. The cutting site of Cas9 is indicated by arrow. (B) Expression profile of  
 36 Sectm1a in various organs of WT mice were determined using qRT-PCR (n=3). (C) WT-BMDMs were  
 37 treated with indicated doses of LPS for 24 h, Sectm1b expression levels were measured with qRT-PCR  
 38 (n=3). (\*,  $p < 0.05$ , data are presented as Mean  $\pm$  SEM, Student's t test).

39

40

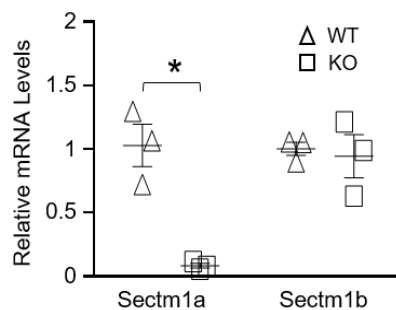

41

42 **Fig. S2** q-PCR results of spleen samples confirmed Sectm1a was deleted, whereas Sectm1b gene  
 43 expression was not affected (n=3). (\*,  $p < 0.05$ , data are presented as Mean  $\pm$  SEM, Student's t test).

44

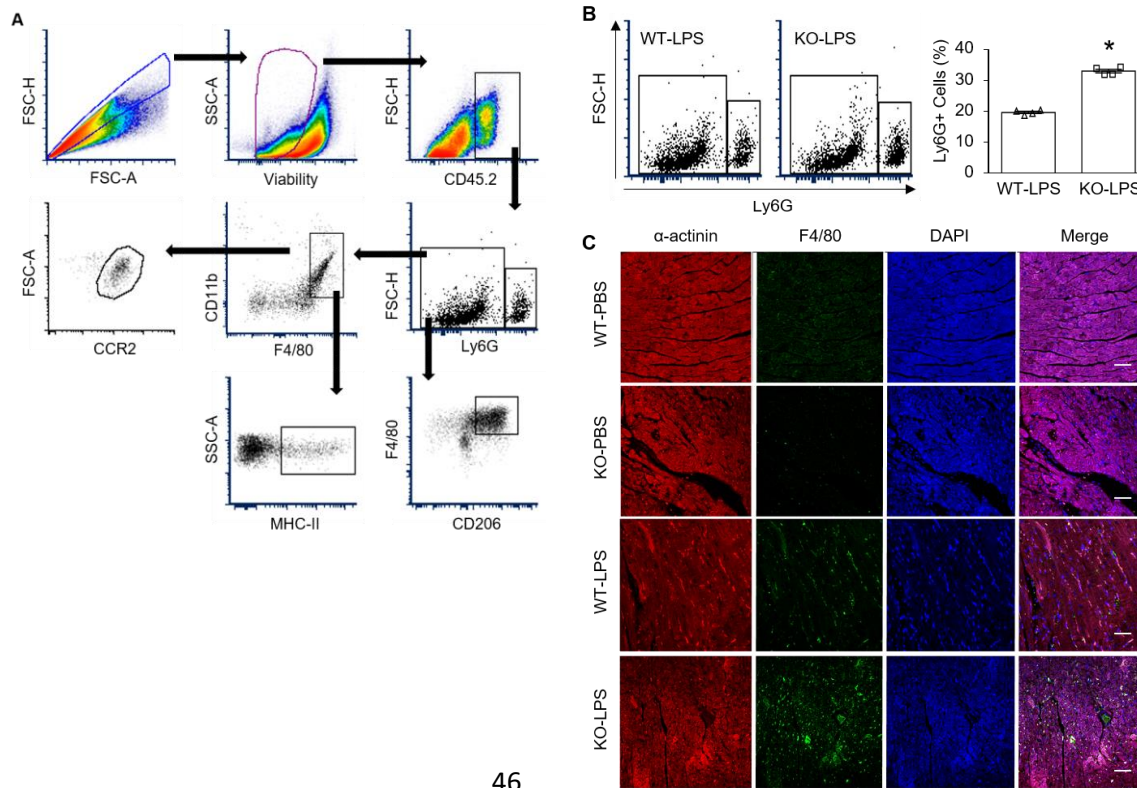

46

47 **Fig. S3** Sectm1a KO mice show stronger cardiac inflammation. (A) Gating strategy for Flow Cytometry  
 48 analysis of cardiac macrophages. (B) Representative plots and quantification of neutrophils (Ly6G+) in  
 49 the heart of WT and Sectm1a KO mice 12 h after LPS treatment (n=4). (C) 12 h after LPS injection, heart  
 50 samples from WT and Sectm1a KO mice were harvested and stained with markers for cardiomyocytes ( $\alpha$ -  
 51 actinin) and macrophage (F4/80), DNA was stained with DAPI (blue). (Scale bar, 50  $\mu$ m; \*,  $p < 0.05$ , data  
 52 are presented as Mean  $\pm$  SEM, Student's t test).

53

54

55

56

57

## Bone Marrow-Derived Macrophages

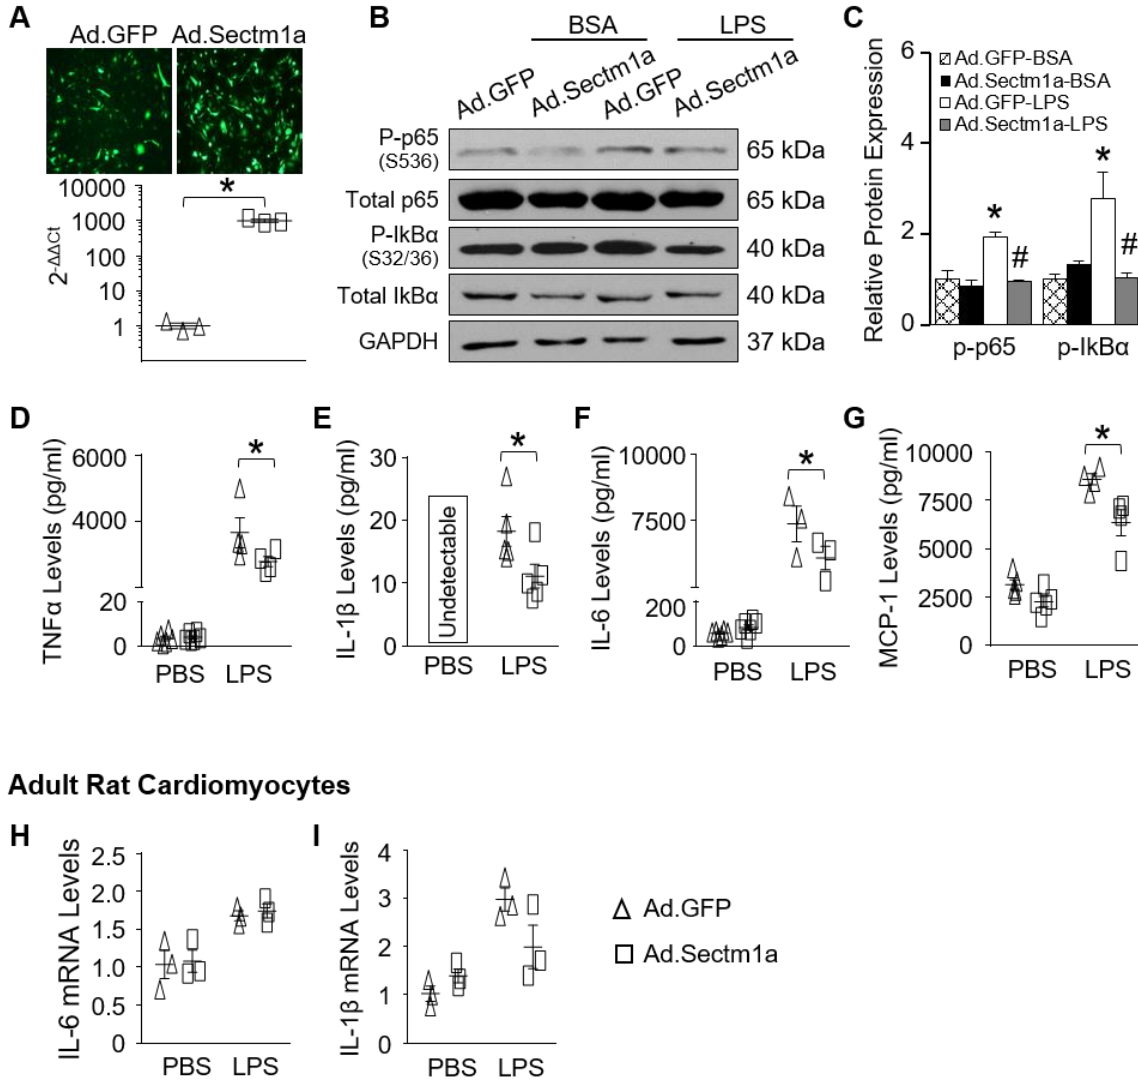

58

59 **Fig. S4** Overexpression of Sectm1a reduces cytokine production in BMDMs, but not in cardiomyocytes.

60 (A) Representative images of BMDMs infected with adenovirus encoding Sectm1a (or GFP as control),

61 and qRT-PCR result validating that overexpression of Sectm1a was successful (n=3). (B) Western

62 blotting and quantification of phosphorylated p65 and IkBα in BMDMs infected with adenovirus,

63 followed by LPS treatment (n=3 dishes of BMDMs for isolation of proteins). (D-G) Concentration of

64 cytokines: TNFα (D), IL-1β (E), IL-6 (F), and MCP-1 (G) from cell culture supernatant were determined

65 by ELISA (n=3-5). (H-I) after infecting cardiomyocytes with adenovirus followed by LPS treatment, gene

66 expression of IL-6 and IL-1β in adult rat cardiomyocytes were measured by qRT-PCR (n=3). (\*,  $p < 0.05$ ,

67 data are presented as Mean ± SEM, 2-way ANOVA).

68

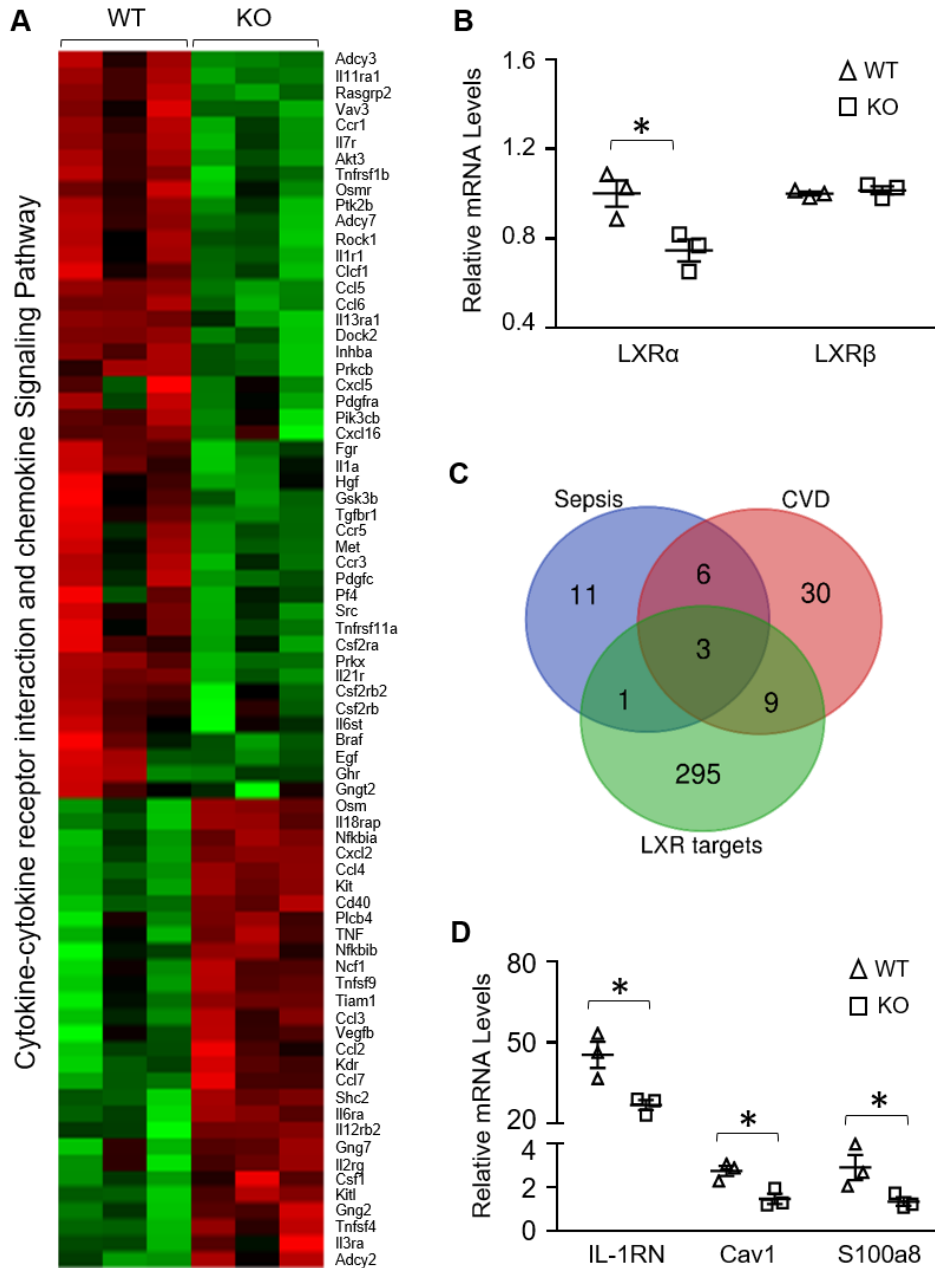

69

70 **Fig. S5** Gene expression profile analysis reveals inflammatory phenotype of BMDMs due to disrupted  
 71 LXR signaling. (A) Heatmap comparison of genes involved in cytokine-cytokine receptor interaction and  
 72 chemokine signaling pathway. (B) Expression of LXRα and LXRβ as determined by RNA-seq analyses;  
 73 (C) Venn diagram showing overlapped genes involved in sepsis, cardiovascular disease, and LXR-related  
 74 signaling from our RNA-seq analyses. (D) Three genes overlapped among the 3 pathways mentioned in  
 75 the Venn diagram (C) (n=3 of each genotype). (\*,  $p < 0.05$ , data are presented as Mean ± SEM, 2-way  
 76 ANOVA).

77

78

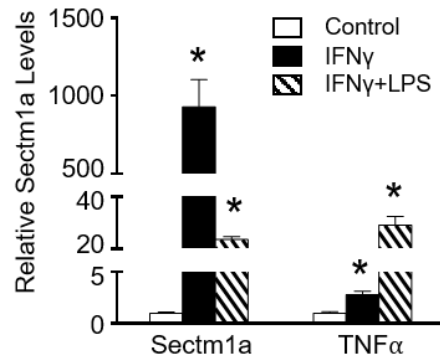

79

80 **Fig. S6** WT BMDMs were treated with IFN $\gamma$  alone (10 ng/ml), or together with LPS (10 ng/ml) for 4 h,  
 81 gene expression of Sectm1a and TNF $\alpha$  were determined by qRT-PCR (n=3). (\*,  $p < 0.05$ , data are  
 82 presented as Mean  $\pm$  SEM, Student's t test).

83

84

85

**Table S1. Echocardiographic measurements in WT and Sectm1a-KO mice after 12 h of LPS injection**

|                       | WT-PBS           | KO-PBS           | WT-LPS             | KO-LPS             |
|-----------------------|------------------|------------------|--------------------|--------------------|
| Diameter;s            | 2.72 $\pm$ 0.09  | 2.41 $\pm$ 0.4   | 2.43 $\pm$ 0.15    | 2.92 $\pm$ 0.14    |
| Diameter;d            | 3.93 $\pm$ 0.09  | 3.98 $\pm$ 0.14  | 3.09 $\pm$ 0.16 *  | 3.37 $\pm$ 0.16    |
| Volume;s              | 27.90 $\pm$ 2.17 | 30.67 $\pm$ 2.39 | 21.46 $\pm$ 3.19   | 33.46 $\pm$ 3.99   |
| Volume;d              | 67.68 $\pm$ 3.48 | 69.91 $\pm$ 5.65 | 38.43 $\pm$ 4.55 * | 47.42 $\pm$ 5.19   |
| Stroke Volume         | 39.78 $\pm$ 1.53 | 39.24 $\pm$ 3.51 | 16.97 $\pm$ 1.85 * | 13.96 $\pm$ 1.47   |
| Ejection Fraction     | 59.25 $\pm$ 1.38 | 55.86 $\pm$ 1.3  | 45.10 $\pm$ 2.7 *  | 29.63 $\pm$ 1.56 # |
| Fractional Shortening | 31.02 $\pm$ 0.92 | 28.74 $\pm$ 0.89 | 21.67 $\pm$ 1.48 * | 13.44 $\pm$ 0.77 # |
| Cardiac Output        | 22.06 $\pm$ 0.72 | 22.08 $\pm$ 2.22 | 5.14 $\pm$ 0.95 *  | 4.99 $\pm$ 0.59    |

\* ,  $p < 0.05$  when comparing WT-PBS to WT-LPS

# ,  $p < 0.05$  when comparing WT-LPS to KO-LPS

86

87

**Table S2. Echocardiographic measurements in WT and Sectm1a-KO mice with GW3965 and LPS injection**

|                       | WT-DMSO      | KO-DMSO      | WT-GW3965      | KO-GW3965      |
|-----------------------|--------------|--------------|----------------|----------------|
| Diameter;s            | 3.03 ± 0.26  | 3.07 ± 0.12  | 2.43 ± 0.18    | 3.14 ± 0.19 #  |
| Diameter;d            | 3.72 ± 0.27  | 3.55 ± 0.1   | 3.29 ± 0.17    | 3.74 ± 0.2     |
| Volume;s              | 37.51 ± 6.91 | 37.54 ± 3.3  | 22.11 ± 4.06   | 40.19 ± 6.03 # |
| Volume;d              | 60.92 ± 9.48 | 52.77 ± 3.6  | 45.19 ± 5.83   | 60.89 ± 8.04   |
| Stroke Volume         | 23.406875    | 15.23 ± 0.79 | 23.07 ± 1.98   | 20.69 ± 2.05   |
| Ejection Fraction     | 39.94 ± 2.89 | 29.28 ± 1.94 | 53.22 ± 2.7 *  | 34.68 ± 1.28 # |
| Fractional Shortening | 19.06 ± 1.48 | 13.35 ± 0.95 | 26.75 ± 1.58 * | 16.2 ± 0.62 #  |
| Cardiac Output        | 9.51 ± 1.53  | 5.65 ± 0.61  | 8.86 ± 1.12    | 8.82 ± 1.19    |

\* ,  $p < 0.05$  when comparing WT-DMSO to WT-GW3965

# ,  $p < 0.05$  when comparing WT-GW3965 to KO-GW3965

**Table 3. Echocardiographic measurements in WT and Sectm1a-KO mice with 20 weeks of HFD feeding**

|                       | WT-HFD       | KO-HFD         |
|-----------------------|--------------|----------------|
| Diameter;s            | 2.86 ± 0.11  | 3.29 ± 0.06 *  |
| Diameter;d            | 4.19 ± 0.1   | 4.44 ± 0.07    |
| Volume;s              | 31.77 ± 2.71 | 43.98 ± 1.97 * |
| Volume;d              | 78.97 ± 4.19 | 90.17 ± 3.38   |
| Stroke Volume         | 47.2 ± 2.58  | 46.19 ± 2.41   |
| Ejection Fraction     | 60.25 ± 2.23 | 51.1 ± 1.59 *  |
| Fractional Shortening | 32.04 ± 1.53 | 26.01 ± 1.01 * |
| Cardiac Output        | 22.65 ± 1.63 | 19.42 ± 1.26 * |

\* ,  $p < 0.05$  when comparing WT-HFD to KO-HFD

**Table S4. Primers used in this study**

| <i>qRT-PCR primers</i>    |                               |                               |
|---------------------------|-------------------------------|-------------------------------|
| <b>Gene</b>               | <b>Forward</b>                | <b>Reverse</b>                |
| Sectm1a                   | 5'-CAGTGATGACCTGTAACATCTC-3'  | 5'-CAAGTATATCCCTGTGTGGTTCG-3' |
| Sectm1b                   | 5'-GAGAAGCAGGTAAGAAGCTGGAG-3' | 5'-CAGTTCACACCGAAGAACCC-3'    |
| <i>Genotyping primers</i> |                               |                               |
| Sectm1a                   | 5'-CATTCTCTCCATACAGGCTGG-3'   | 5'-CTTGAAGCTGGAGCTCCAC-3'     |

92

93

94

95

**Table S5. Antibodies used for Flow Cytometry**

| <b>Name</b>     |                  | <b>Company</b> | <b>Cat. #</b> |
|-----------------|------------------|----------------|---------------|
| LIVE/DEAD Stain |                  | Thermo Fisher  | L34962        |
| CD45.2          | Alexa Flour 488  | Biologend      | 109816        |
| Ly6G            | BV421            | Biologend      | 127628        |
| CD11b           | APC-eFlour 780   | eBioScience    | 47-0112-80    |
| Ly6C            | APC              | eBioScience    | 17-5932-82    |
| F4/80           | BV510            | Biologend      | 123135        |
| MHC-II          | PerCP-eFluor 710 | eBioScience    | 46-5321-82    |
| CD206           | Alexa Flour 700  | Bio-Rad        | MCA2235A700   |
| CCR2            | PE-Cy7           | Biologend      | 150612        |
| CD38            | PE-Cyanine 7     | eBioScience    | 25-0381-82    |
| CD301           | PE               | Biologend      | 145704        |

96
